# Supplementary material for: Detecting influential observations by cluster analysis and Monte Carlo cross-validation
Source: Royal Society of Chemistry journal article supplement (doi:10.1039/c0an00345j), 2010-01-01
Supplement: c0an00345j.pdf [file c0an00345j.pdf]

✓ Supplementary Figures

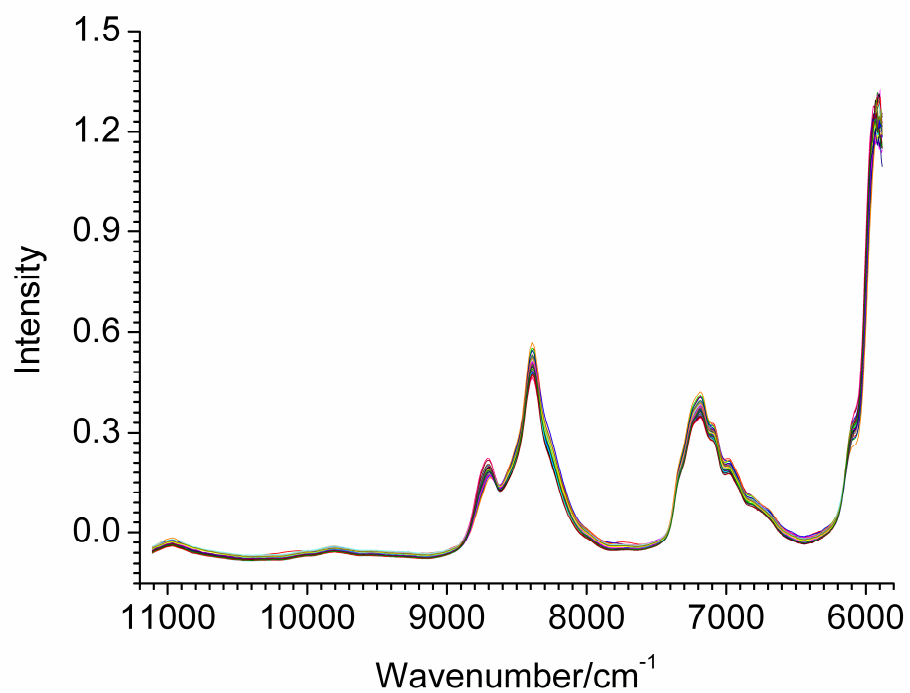

Fig. S1 Measured NIR Spectra of gasoline samples

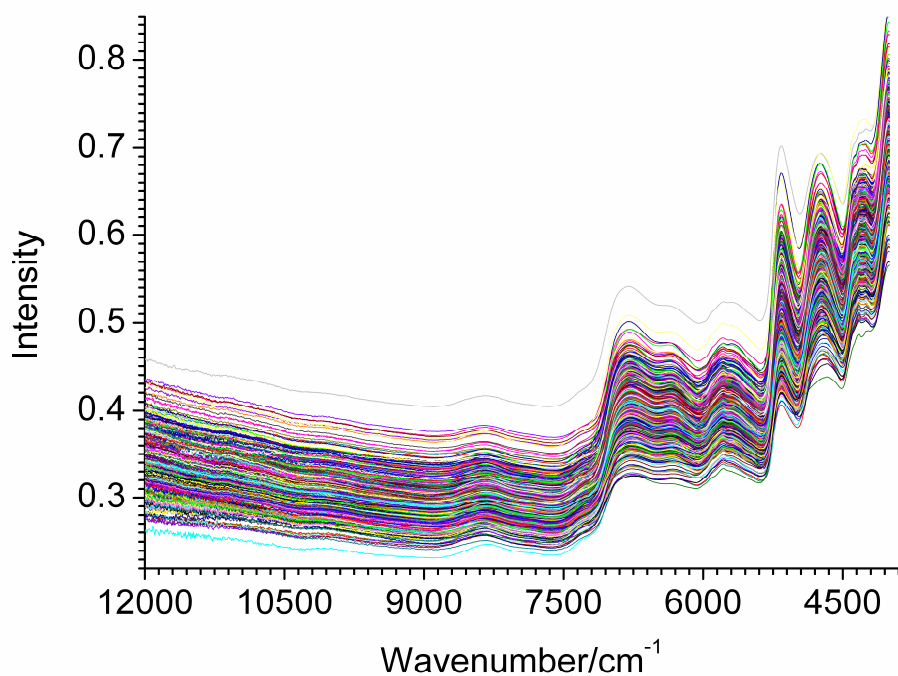

Fig. S2 Measured NIR spectra of the tobacco samples

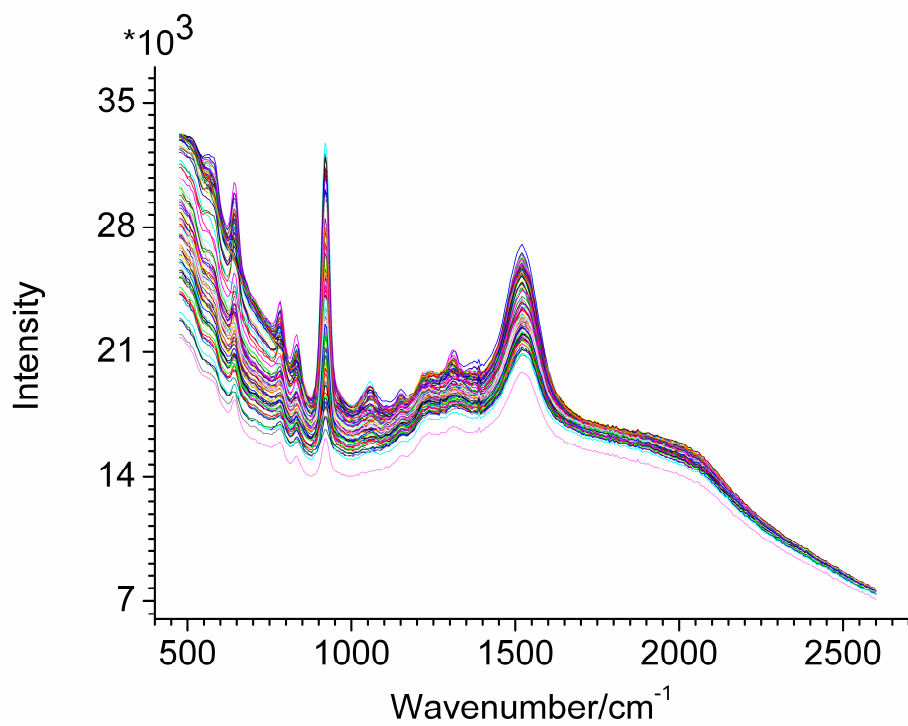

Fig. S3 Measured Raman spectra of the egg white samples
